1 The global root exudate carbon flux

2

3 Authors:

4 Nikhil R. Chari (0000-0002-2144-9961)<sup>\*,a</sup>, Shersingh Joseph Tumber-Dávila (0000-0001-7336-3943)<sup>b,c</sup>,  
5 Richard P. Phillips (0000-0002-1345-4138)<sup>d</sup>, Taryn L. Bauerle (0000-0003-2741-2593)<sup>e</sup>, Melanie Brunn  
6 (0000-0002-5692-8575)<sup>f</sup>, Benjamin D. Hafner (0000-0003-2348-9200)<sup>g</sup>, Tamir Klein (0000-0002-3882-  
7 8845)<sup>h</sup>, Sophie Obersteiner (0000-0003-1930-4058)<sup>h</sup>, Michaela K. Reay (0000-0001-6335-1690)<sup>i,j</sup>, Sami  
8 Ullah (0000-0002-9153-8847)<sup>j</sup>, Benton N. Taylor (0000-0002-9834-9192)<sup>a</sup>

9

10 \*corresponding author, [nchari@g.harvard.edu](mailto:nchari@g.harvard.edu)

11

12 <sup>a</sup>Department of Organismic and Evolutionary Biology, Harvard University, Cambridge, MA, USA

13 <sup>b</sup>Harvard Forest, Harvard University, Petersham, MA, USA

14 <sup>c</sup>Department of Environmental Studies, Dartmouth College, Hanover, NH, USA

15 <sup>d</sup>Department of Biology, Indiana University, Bloomington, IN, USA

16 <sup>e</sup>School of Integrative Plant Science, Cornell University, Ithaca, NY, USA

17 <sup>f</sup>Department of Geography, Universität Koblenz, Koblenz, Germany

18 <sup>g</sup>Soil Biophysics & Environmental Systems, Department of Life Sciences, Technische Universität  
19 München, Freising, Germany

20 <sup>h</sup>Department of Plant and Environmental Sciences, Weizmann Institute of Science, Rehovot, Israel

21 <sup>i</sup>Organic Geochemistry Unit, School of Chemistry, University of Bristol, Bristol, UK

22 <sup>j</sup>Department of Geography, Earth and Environmental Sciences & Birmingham Institute of Forest  
23 Research, University of Birmingham, Birmingham, UK

24

25 **Abstract.**

26 Root exudation, the export of low-molecular weight organic carbon (C) from living plant roots to soil,  
27 influences microbial activity, nutrient availability, and ecosystem feedbacks to climate change, but the  
28 magnitude of this C flux at ecosystem and global scales is largely unknown. Here, we synthesize *in situ*  
29 measurements of root exudation rates and couple those to estimates of fine root biomass to estimate  
30 global and biome-level root exudate C fluxes. We estimate a global root exudate flux of 15.2 PgC y<sup>-1</sup>, or  
31 about 10% of global annual gross primary productivity. We found no differences in root mass-specific  
32 exudation rates among biomes, though total exudate fluxes are estimated to be greatest in grasslands  
33 owing to their high density of absorptive root biomass. Our synthesis highlights the global importance of  
34 root exudates in the terrestrial C cycle and identifies regions where more *in situ* measurements are needed  
35 to improve future estimates of root exudate C fluxes.

36

37 **Keywords.** Rhizosphere carbon flux, rhizodeposition, carbon cycle, belowground carbon allocation, soil  
38 carbon, global carbon flux

39

40

41

42

43

44

45

46

47

48

49

50

51 **Introduction.**

52 Root exudation – the release of low-molecular weight organic carbon (C) compounds from living plant  
53 roots into soil – mediates plant-soil interactions in a variety of ways, including facilitating plant nutrient  
54 acquisition via chemical and biological mechanisms (*e.g.* Jones and Darrah 1994; Meier et al. 2017),  
55 altering soil microbial communities (*e.g.* Shi et al. 2011), and impacting soil carbon dynamics (*e.g.* Yin et  
56 al. 2014). Root exudates mediate plant nutrient acquisition via a suite of chemical and biological  
57 mechanisms, in the process influencing the cycling of soil nutrients including phosphorus (P) and  
58 nitrogen (N). For instance, organic acids can increase plant access to inorganic P via rhizosphere  
59 acidification and phosphate mineral dissolution (Gillespie and Pope 1991; Hoffland 1992) or by  
60 displacing phosphate ions bound to mineral sorption sites (Jones and Darrah 1994; Bolan et al. 1994).  
61 Root exudates can also regulate mineralization of organic N and P by interacting with soil microbial  
62 communities. Enhanced root exudation has been correlated with the activities of enzymes involved in  
63 microbial N mineralization (Phillips et al. 2011; Meier et al. 2017) and P mineralization (Spohn et al.  
64 2013).

65         Additionally, root exudation represents an important C flux to the soil that has unique effects on  
66 soil C dynamics. This is because root exudates can exert rapid effects on “stable” soil C formation and  
67 loss (more rapid than leaf or root litter which must be decomposed) (Sokol et al. 2019a). For example,  
68 chemical binding of C-based exudates onto soil minerals can result in soil C formation (Jones et al. 2003;  
69 Sokol et al. 2019b), whereas microbial activation due to fresh exudate C inputs could result in soil C loss  
70 via the “priming effect,” in which fresh C inputs stimulate microbial respiration rates (Kuzyakov et al.  
71 2000). Recent field and lab experiments have shown that the rate of root exudation dictates both the rates  
72 of soil C formation and soil C loss (Yin et al. 2014; Chari and Taylor 2022) and is thus a relevant  
73 parameter for estimating soil C stocks and fluxes. In addition to its role in belowground C dynamics, root  
74 exudation may also be important for regulating C uptake aboveground. For example, in the Duke Free-Air  
75 CO<sub>2</sub> Enrichment (FACE) experiment, aboveground productivity was sustained under elevated CO<sub>2</sub> in part  
76 due to enhanced exudation and accelerated N turnover (Phillips et al. 2011; Drake et al. 2011). In addition

77 to elevated CO<sub>2</sub>, warming, drought, and N deposition have all been shown to influence root exudation  
78 rates over relatively short timescales (*e.g.*, Phillips et al. 2011; Calvo et al. 2019; Xiong et al. 2020). Due  
79 to its role in regulating C cycle dynamics and its potentially rapid response to global change, capturing the  
80 exudation rate accurately at the global scale is necessary for making C cycle projections.

81 Process-based C cycle models often incorporate root exudation indirectly as a fraction of net or  
82 gross primary productivity (NPP or GPP, respectively) into a dissolved or low-molecular weight C pool  
83 (*e.g.*, Abramoff et al. 2018; Tao et al. 2023). The magnitude of this flux can be estimated in different  
84 ways. A number of modeling studies have used experimental measurements to constrain the direct C flux  
85 from plants to dissolved C pools (Sulman et al. 2014; Wieder et al. 2018). At least one model (Fixation  
86 and Uptake of Nitrogen, or FUN) calculates the root exudate flux as a function of C supply and nitrogen  
87 (N) demand, allowing it to be coupled to soil C models (Brzostek et al. 2014; Sulman et al. 2017). While  
88 we have the ability to link these models to local site-specific exudation data, we currently have virtually  
89 no empirically derived ecosystem-scale estimates of exudate C fluxes with which to compare the output  
90 of C cycle models at large scales. Given the increasing recognition of the importance of exudates in the C  
91 cycle and the increasing effort to incorporate this flux into ecosystem models, it is critical that we  
92 establish an empirical benchmark for the exudate C flux.

93 One reason for the absence of an exudate C flux estimate is the challenge of making exudate C  
94 measurements *in situ*. Exudates are released from live fine roots belowground, rapidly assimilated by  
95 microbes, and occur at low concentrations relative to large soil C pools resulting in small signal to noise  
96 ratios. To maximize the accuracy of *in situ* root exudation measurements, researchers must isolate intact  
97 fine roots from soil and incubate them under conditions that simulate the soil environment. Since the  
98 2010s, *in situ* collection of root exudates has most frequently been performed using the “cuvette method,”  
99 which involves the incubation of a live fine root system in an open chamber filled with a glass bead  
100 matrix and nutrient solution culture (Phillips et al. 2008). Due to the challenges of accurately capturing  
101 root exudate C, relatively few *in situ* literature measurements exist compared to other major C fluxes.  
102 Here, we use a combination of these literature-derived measurements along with our own measurements

103 of *in situ* root exudation to estimate the global root exudate C flux and biome-level exudate fluxes. We  
104 provide a) estimates for root mass-specific exudation rates, b) estimates for area-specific exudation rates,  
105 c) estimates for exudation as a proportion of GPP, and d) an estimate of the global annual flux of root  
106 exudate C into soil. Given the paucity of exudation measurements that exist currently, our estimates will  
107 be useful for improving the accuracy of simulated exudation rates in artificial root exudate experiments,  
108 incorporating root exudation into process-based C models, and improving ecosystem C budgets.

109

## 110 **Methods.**

111 *Data collection.* We collected data from 40 studies measuring root exudation *in situ* including 128 sets of  
112 measurements (Fig. 1). Thirty-three studies were derived from a literature review and 7 studies were  
113 original, unpublished measurements by the authors. The literature review was restricted to studies of *in*  
114 *situ* (*i.e.* we excluded hydroponic studies and greenhouse experiments) total organic C exudation  
115 measurements from mature trees, shrubs, or grasses (*i.e.*, we excluded seedlings) using the cuvette  
116 method (Phillips et al. 2008). We used the search terms “in situ” “root exudation” and “cuvette method”  
117 on Google Scholar and additionally searched citations of Phillips et al. (2008) (the original description of  
118 the cuvette method).

119 We collected exudation rate data from each study in units of root exudate C per unit time per root  
120 biomass, root surface area, or root length. For each study, we determined the study-average exudation rate  
121 and the species-average exudation rate if multiple species were measured in a single study. When  
122 calculating the species-average rate, a small number of species with low sample sizes had a  
123 disproportionate influence on our calculations (*e.g.*, 4 species from the same study exceeded all other  
124 values in the dataset and exceeded the mean exudation rate by 4 s.d.), so we used the study-average  
125 exudation rate data for our scaling and analyses. Exudation rates are most commonly reported on a root  
126 biomass basis, which facilitates their inclusion into ecosystem C budgets. For studies reporting root  
127 exudation on a root surface area or root length basis, we converted these measurements to a root biomass

128 basis using conversion factors derived from Jackson et al. (1997). Root exudation per unit root biomass  
129 per unit time ( $\mu\text{g C g}^{-1} \text{ h}^{-1}$ ) is henceforth referred to as the specific exudation rate (SER).

130

131 *Scaling.* We took a biome-level approach to scaling root-mass based exudation rates, which first required  
132 assigning each study in our SER dataset to one of 10 terrestrial biomes with fine root biomass data in  
133 Jackson et al. (1997) (Table 1) based on vegetation type and environmental characteristics. Of these 10  
134 biomes, 6 are represented in the SER dataset. We then scaled the SER to a soil area basis using biome-  
135 level live fine root biomass (FRB) per soil surface area ( $\text{kg m}^{-2}$ ) estimates from Jackson et al. (1997). In  
136 this scaling, we made the assumption that *in situ* root exudation measurements are made from absorptive  
137 fine root biomass (AFRB). We estimated the proportion of total FRB that is AFRB for each biome (Table  
138 1) from McCormack et al. (2015). To scale the root exudate carbon flux from an hourly basis to a yearly  
139 basis, we assumed exudation rates during the non-growing season are 76% of the growing season root  
140 exudation rate based on the studies in our data set that included growing season and non-growing season  
141 measurements ( $n = 10$ ). We estimated the length of the growing season based on the biome (Table 1;  
142 Churkina et al. 2005; Piao et al. 2007). Thus, the root exudate C flux per soil surface area per year  
143 (henceforth  $F_{ex}$  in units of  $\text{kg C m}^{-2} \text{ y}^{-1}$ ) is calculated as follows for each data point:

144 Equation 1:  $F_{ex} = \text{SER} \times P_{AFRB} \times \text{FRB} \times [\text{GS} + R_{NGS}(L_{yr} - \text{GS})]$

145 Where SER is the specific root exudation rate (expressed on a per-root-mass basis),  $P_{AFRB}$  is the  
146 proportion of FRB in absorptive roots (as opposed to transport roots) (McCormack et al. 2015), GS is the  
147 length of the growing season,  $R_{NGS}$  is the ratio of the exudation rate between non-growing season and  
148 growing season measurements, and  $L_{yr}$  is the length of the year (Fig. 2).

149 To determine per-biome average GPP we corrected per-biome NPP model estimates (Kicklighter  
150 et al. 1999) by an NPP:GPP factor of 0.46 ( $\pm 0.008$  SE) (Collalti and Prentice 2019). We then divided  $F_{ex}$   
151 by the GPP of the appropriate biome to determine the proportion of GPP as root exudate C ( $P_{ex}$ ).

152 Uncertainties for FRB,  $P_{AFRB}$ , and NPP varied by biome and can be found in Table S2.

153 To determine the global exudate C flux, we scaled exudate C fluxes across land surface areas of  
154 each biome from Jackson et al. (1997). The 11 land area biomes differ slightly from the 10 FRB biomes  
155 presented in Jackson et al. (1997). Of the land area biomes, 5 overlap with FRB biomes from which we  
156 have SER measurements (temperate evergreen forest, temperate deciduous forest, temperate grassland,  
157 tropical seasonal forest, tropical rainforest), 4 overlap with FRB biomes without SER data (boreal forest,  
158 savanna, desert, tundra), and 2 do not overlap with FRB biomes (woodland/shrubland (which includes but  
159 does not overlap completely with the Mediterranean biome) and cultivated) (Table 1). For the 5 matching  
160 biomes, we scaled the median biome  $F_{ex}$  by the global land surface area of the biome. For the 4 biomes  
161 that are not represented in our exudation dataset, we scaled the median SER of all biomes by the biome  
162 AFRB, biome GS, and biome global land surface area. For the two biomes that do not have FRB data, we  
163 scaled the median  $F_{ex}$  of all biomes by that biome's global land surface area. Two other scaling methods,  
164 which yielded similar results, are detailed in the supplement. We estimated the global root exudate flux  
165 ( $G_{ex}$ ) by summing the fluxes across the entire land surface area of each biome (Table 1, Fig. 2). To  
166 determine the proportion of global GPP, we divided  $G_{ex}$  by a global GPP estimate from Badgley et al.  
167 2019. All terms used in scaling to the global flux may be found in Table 1.

168  
169 *Environmental data.* We collected latitude and longitude information from each study in our dataset. We  
170 matched these coordinates to gridded global precipitation (Markus et al. 2022), temperature (Rohde and  
171 Hausfather 2020), and soil respiration (Stell et al. 2021) datasets to determine mean annual precipitation  
172 (MAP), mean annual temperature (MAT), and soil heterotrophic respiration (Rh) at each site. We  
173 analyzed relationships between SER and latitude, MAP, MAT, Rh, and mycorrhizal type (*e.g.*, plant  
174 associations with arbuscular vs ectomycorrhizal fungi) for both study-average and species-average data.  
175 We found that relationships between the species-average SER with latitude and MAT were due to several  
176 studies that sampled a high number of species at low replication (as explained above). We did not find  
177 these relationships with the study-average SER, which were less susceptible to anomalous values. As a

178 result, only the study-average data are presented in the main text of this manuscript, and species-average  
179 relationships can be found in Fig. S1.

180

181 *Statistical analysis.* We used ANOVA models to analyze differences in SER,  $F_{ex}$ , and  $P_{ex}$  between  
182 different biomes. We used Tukey's Honest Significant Difference test to determine which biomes were  
183 different from each other. We used separate linear models to assess relationships between SER and each  
184 environmental predictor variable. All stats were done with the "stats" package. Significance was assessed  
185 at an alpha value of  $P = 0.05$ .

186

## 187 **Results.**

188 *Specific root exudation rate.* The median SER across all biomes was  $67.4 \text{ ug C g}^{-1} \text{ h}^{-1}$  (IQR =  $17.8 - 107.6$   
189  $\text{ug C g}^{-1} \text{ h}^{-1}$ ). The mean SER is inflated due to non-normally distributed data; thus, we choose to report  
190 median SER here, which is likely closer to the true value (this is also true for all subsequent calculations).  
191 We did not find any statistically significant effects of biome type on SER (Fig. 3a). We found the species-  
192 average SER was greater in arbuscular mycorrhizal plant species than ectomycorrhizal plant species, but  
193 this difference was non-significant ( $P = 0.06$ ) and disappeared when latitude was included as a covariate  
194 ( $P > 0.2$ ). Study-average SER was greater in studies with only AM species than studies with only EM  
195 species, independent of latitude ( $P = 0.046$  Fig. S2). We did not observe any effects of MAP, MAT,  
196 latitude, or soil heterotrophic respiration on the study-average SER (Fig. S1).

197

198 *Area-based root exudate C flux.* We determined the root exudate C flux on a  $\text{m}^{-2}$  basis by scaling SER by  
199 AFRB. The median  $F_{ex}$  was  $0.079 \text{ kg C m}^{-2} \text{ y}^{-1}$  (IQR =  $0.018 - 0.171 \text{ kg C m}^{-2} \text{ y}^{-1}$ ).  $F_{ex}$  was significantly  
200 higher in temperate grasslands than temperate forests and Mediterranean biomes ( $P \leq 0.040$ , Fig. 3b).

201



202 *Proportion of C allocated to exudates.* We derived biome-level GPP estimates to determine the  
203 proportion of GPP as root exudates (*i.e.*,  $P_{ex} = F_{ex}/GPP$ ) within each biome. For the six biomes for which  
204 we could calculate  $P_{ex}$ , the median  $P_{ex}$  was 5.5% (IQR = 1.6% – 12.6%) and the median proportion of  
205 NPP was 12.0% (IQR = 3.5% – 27.4%). We found a significant effect of biome type on  $P_{ex}$ , with  
206 temperate grasslands having higher  $P_{ex}$  than all other biome types ( $P < 0.002$ , Fig. 3c).

207 We also compared our derived  $F_{ex}$  to existing literature measurements of total belowground  
208 carbon allocation (TBCA) by mass balance for six field sites representing each biome in our SER dataset  
209 (Table 2). TBCA includes C allocated to root respiration, root production, rhizodeposition/exudation, and  
210 mycorrhizal allocation (Carol Adair et al. 2009). In theory,  $F_{ex}$  should be some non-trivial proportion of  
211 TBCA, but should not exceed TBCA. Indeed,  $F_{ex}$  ranged from 6% of TBCA (temperate coniferous forest)  
212 to 60% (temperate grassland) depending on the site.

213 *Global root exudate C flux.* We scaled median biome-level data by land surface area measurements to  
214 determine the global root exudate C flux (Table 1). The median global root exudate C flux ( $G_{ex}$ ) was 15.2  
215 Pg C  $y^{-1}$ . We also scaled the first and third quartiles to obtain a range of 8.1 – 22.8 Pg C  $y^{-1}$ . This flux  
216 represents 10.4% (range = 5.5% – 15.5%) of global annual GPP (147 Pg C  $y^{-1}$ ) (Badgley et al. 2019).  
217 While measurements in temperate forests account for 73% of the studies in our dataset, globally  
218 temperate forests only contribute 2.8% of the root exudate C flux. On the other hand, grasslands  
219 constitute only 3 measurements (< 8% of the dataset), but grasslands (temperate and savanna) represent  
220 45% of the estimated global exudate C flux (Fig. 4).

221

222 *Sensitivity analysis.* We varied each factor involved in our flux estimate independently to determine the  
223 sensitivity of the scaled estimate to each factor (Table S3). Per Equation 1,  $F_{ex}$  is equally dependent on  
224 SER, FRB, and  $P_{AFRB}$ . Of these three factors,  $P_{AFRB}$  is the one that carries the most uncertainty, so an  
225 improved estimate of  $P_{AFRB}$  is most likely to affect our flux estimates. Varying  $P_{AFRB}$  by the range  
226 presented in McCormack et al. (2015) resulted in an uncertainty around the median  $F_{ex}$  of over  $\pm 70\%$ .  $F_{ex}$



227 is also dependent, to a lesser degree, on GS and  $R_{NGS}$ . However, varying these terms affected the median  
228  $F_{ex}$  by less than  $\pm 10\%$ .

229

## 230 **Discussion.**

231 Our primary goal in this meta-analysis was to derive the most accurate and robust estimate of the annual  
232 global root exudate C flux possible given current data availability. Our analysis suggests a considerable  
233 global exudate flux of  $15.2 \text{ PgC y}^{-1}$  comprising 10.4% of global GPP. Before this study, the magnitude  
234 and importance of the root exudate C flux was largely unknown. At 10.4% of global annual GPP, the  
235 global root exudation flux ( $G_{ex}$ ) matches remarkably well with measurements from growth chamber  
236 experiments reporting 4 – 18% of photosynthetically fixed C released as root exudates (Barber and Martin  
237 1976; Dror and Klein 2022). The amount of C released as exudates is likely to affect soil microbial  
238 activity, soil nutrient availability, and soil C dynamics, all of which affect feedbacks to plants and  
239 ecosystems at the global scale – and the results of this study suggest that this amount is considerable.  
240 Thus, we impress the importance of continued measurements of root exudation, studies which investigate  
241 the effects of root exudates on soil C dynamics, and incorporation of the root exudate C flux into models.

242 The global proportion of GPP that we estimate as root exudation (10.4%) differs from the  
243 median proportion of GPP in all the studies in our dataset (5.5%) – a difference that underscores the  
244 importance of grasslands to the global root exudate carbon flux. Grassland observations make up only a  
245 small proportion of our dataset (3 out of 40 studies), but together temperate grasslands and savannas  
246 represent 20% of the global land surface area (Jackson et al. 1997) and 45% of  $G_{ex}$ . Grasslands contribute  
247 much more to  $G_{ex}$  than their surface area would suggest because they have a much higher proportion of  
248 absorptive fine root biomass ( $P_{AFRB}$ ), where exudation primarily occurs, than forest ecosystems. The SER  
249 in grasslands is not significantly higher than other biomes, but because grasslands have both high FRB  
250 and  $P_{AFRB}$ , the  $F_{ex}$  is much higher in grasslands at 46% of GPP (compared to the overall median of 5.5%)  
251 (Fig. 3). Additionally, our TBCA comparison showed that exudation could be around 60% of TBCA at

252 the grassland site, compared to 6-16% at other sites. While these numbers appear high, grasses invest  
253 most of their productivity belowground (Sun et al. 2021) and do not allocate C to build transport roots  
254 (McCormack et al. 2015), so grasses may be able to expend more C on absorptive root exudation. This is  
255 also consistent with stable isotope experiments which show most grassland belowground C export is  
256 associated with heavy fraction soil (where exudates accumulate) rather than light fraction soil (where root  
257 litter accumulates) (Fossum et al. 2022). However, we do caution that field-collected exudation data is  
258 extremely rare for grasslands (3 studies), so our estimates for this particularly important biome are based  
259 on relatively little current information (Fig 4).

260 Our estimate for the global exudate C flux ( $15.2 \text{ PgC y}^{-1}$ ) is similar in magnitude to the estimate  
261 of  $13.1 \text{ PgC y}^{-1}$  allocated to mycorrhizal fungi derived by Hawkins et al. (2023). Hawkins' results suggest  
262 that ectomycorrhizal plants allocate a greater proportion of their productivity to mycorrhizae than  
263 arbuscular mycorrhizal plants. Interestingly, our results provide some evidence that arbuscular  
264 mycorrhizal species may allocate more C to exudation than ectomycorrhizal species (Fig. S2), which  
265 suggests a potential trade-off between exudation and mycorrhizal C allocation. Arbuscular mycorrhizal  
266 associated plants may be more incentivized to allocate C to exudation as their mycorrhizae do not provide  
267 them with a robust organic nutrient acquisition mechanism (Read 1991; Phillips et al. 2013). However,  
268 we note that we did not find differences in exudation across arbuscular and ectomycorrhizal species in  
269 temperate forests where these species most commonly co-occur, so this difference may be better ascribed  
270 to an environmental or phylogenetic pattern. Finally, it's important to note that exudation measured via  
271 the cuvette method (all of the studies in this meta-analysis) can also include fungal exudates (Kaiser et al.  
272 2015), so these two flux estimates could partially overlap.

273 From a methods perspective, our results suggest that the cuvette method is robust for  
274 approximating root exudation rates. The agreement of our results with TBCA measured by mass balance  
275 suggests that the cuvette method captures the root exudate C flux to an accurate order of magnitude. Had  
276 the estimates of  $F_{ex}$  exceeded TBCA, further refinements to the method may have been warranted.

277 Nonetheless, some important considerations about field-collected exudate C data remain. Below, we  
278 discuss potential applications of the exudate fluxes we present here and suggest future approaches aimed  
279 at improving the quality of root exudate data for future flux estimates.

280

281 *Using the estimates from this paper.* The estimates provided in this paper have a variety of potential  
282 applications for guiding future empirical research and constraining parameters for future modeling efforts.

283 Artificial root exudate (ARE) experiments: In ARE experiments, artificial exudate solutions are used to  
284 simulate the effects of root exudation on soil biological and physicochemical properties. One limitation of  
285 ARE experiments is that it is challenging to *a priori* simulate an accurate root exudation rate, so the  
286 responses observed in ARE experiments may not always be applicable in nature. Here, we provide  
287 estimates that researchers working in a variety of biomes can use to set the rate of root exudation in their  
288 experiments. For example, researchers could apply the  $F_{ex}$  value presented here for their biome of interest  
289 and scale this value by the surface area of their incubation chamber and length of the experiment to know  
290 how much total artificial exudate C should be added.

291 Processed-based models: In process-based C cycle models, there is often a low-molecular weight carbon  
292 (LMWC) or dissolved organic carbon (DOC) pool (*e.g.*, Abramoff et al. 2018; Tao et al. 2023). Carbon  
293 can reach these pools either directly from plant input (*i.e.*, root exudation) or via microbial transformation  
294 of non-LMWC/DOC plant inputs. Since  $P_{ex}$  is a function of GPP and models typically incorporate total C  
295 input to soil as some function of productivity, or GPP, modelers can use  $P_{ex}$  to describe the proportion of  
296 plant input that moves directly to the LMWC/DOC pool without being microbially processed. We  
297 anticipate this flux may be larger than currently parameterized in processed-based models. For example,  
298 Wieder et al. (2018) incorporates exudation as 2% of NPP, or ~1% of GPP compared to our median  $P_{ex}$   
299 estimates of 12% NPP and 5.5% GPP.

300 Ecosystem C fluxes: Ecosystem scientists and practitioners can use the estimates presented in this paper  
301 to constrain their estimates of root exudation without taking belowground measurements. For example, at  
302 field sites with remote monitoring of GPP from a flux tower, scientists can use our  $P_{ex}$  estimates to

303 determine an approximation of the C flux into soil as root exudates without on-site belowground field  
304 work. By comparing this estimate to TBCA as measured by mass balance (Palmroth et al. 2006; Carol  
305 Adair et al. 2009), researchers can approximate the proportion of C allocated belowground to  
306 exudation/rhizodeposition compared to fine root production.

307

308 *Data interpretation.* We encourage readers to consider several caveats when interpreting these data. First,  
309 we stress that the SER was not different between biomes, and that differences in the exudation rate only  
310 emerged at the soil area level, due to high FRB and  $P_{AFRB}$  in grasslands. Thus, our results do not show, for  
311 example, that grass roots exude more C than tree roots on a per-root basis. Rather, the enhanced  $F_{ex}$  in  
312 grasslands is simply due to high absorptive fine root biomass. In fact, a key finding of our analysis is that  
313 there were no differences in SER across biome types, but this could simply be because a large majority of  
314 our data came from temperate forests. We call for more observations in non-temperate forest biomes to  
315 increase the statistical power of future analyses.

316 Additionally, we suggest that the estimates proposed in this paper are more likely to be  
317 overestimates than underestimates due to the way root exudation is measured. Commonly, root exudation  
318 rates are measured as the net release of C by a mass of fine root tissue into a cuvette over some incubation  
319 period (Phillips et al. 2008). Because exudates are measured from live fine roots, the cuvette incubation is  
320 inherently an open system and is thus prone to C contamination from outside sources, even though  
321 measurements are typically standardized with rootless “control” incubations. The consequence of this is  
322 that studies with a low sample size are particularly prone to the influence of a contaminated measurement.  
323 For this reason, we decided to focus on study-average rather than species-average data in this manuscript  
324 because presenting species-average data contained a high number of species with low sample sizes (*i.e.*,  
325 giving more weight to data with less replication). Biomes with a smaller number of studies in our dataset  
326 may be more likely to have a higher SER due to the same effect. This is also why we focused primarily on  
327 median rather than mean estimates.

328 Finally, we note that in scaling SER to  $F_{ex}$  (and then to  $P_{ex}$  and  $G_{ex}$  subsequently) we relied on  
329 estimates of several other parameters including FRB,  $P_{AFRB}$ , GS, and  $P_{NGS}$ . Of these parameters, FRB was  
330 well constrained by Jackson et al. 1997 and GS and  $P_{NGS}$  had relatively smaller effects on  $F_{ex}$  (Table S3).  
331  $P_{AFRB}$  estimates, on the other hand, are the most uncertain (McCormack et al. 2015) and also carry equal  
332 weight as SER and FRB in determining  $F_{ex}$ . Thus, we suggest our estimate is susceptible to change as  
333  $P_{AFRB}$  estimates are honed and encourage researchers to make  $P_{AFRB}$  measurements when collecting root  
334 trait data.

335

336 *Future measurements.* We urge researchers to continue taking *in situ* measurements of root exudation.

337 Below, we outline several areas scientists can target in the future.

338 Improve measurement quality: Several steps can be taken to improve the quality of SER measurements.

339 First, we strongly encourage researchers to prepare blank incubations and filter their samples when using  
340 the cuvette method. As a quality control method, researchers can look for a correlation between the total  
341 root exudate C and the root mass or root surface area. If there is no relationship, and specifically if low  
342 mass roots are generating high amounts of exudates, this is an indication that C contamination could be  
343 exceeding acceptable levels. C contamination could come from many sources, including both the  
344 environment and materials used in exudate collection. We urge researchers to be rigorous in checking for  
345 potential contamination before publishing measurements.

346 Collect exudates in under-represented biomes: Measurements of root exudation in temperate forests are  
347 over-represented in our dataset. From our current dataset, we are unable to determine if there are biome-  
348 level differences in the SER, largely due to substantial differences in data availability between biomes  
349 (Fig. 3a, Fig. 4). We encourage researchers to target biomes that have an overrepresentation in the global  
350 root exudate flux relative to an underrepresentation in the proportion of the dataset (Fig. 4). These include  
351 grasslands, tropical rainforests, agroecosystems, and all biomes in the global south. Improving data from  
352 these biomes should be the highest priority for constraining future global exudate C flux estimates.

353 Agroecosystems merit special consideration as agricultural practices such as fertilization could have  
354 unique effects on exudation not observed in natural ecosystems.

355 Collect exudates seasonally, including outside the growing season: Exudation measurements are rarely  
356 taken outside of the plants' dominant growing season, but these measurements are vital to determining the  
357 exudate C flux on annual timescales. Additionally, plants in different biomes exhibit reduced C  
358 assimilation during the non-growing season for different reasons. Since the plant response to the non-  
359 growing season is different between biomes where the non-growing season is driven by low precipitation  
360 vs. those driven by cold temperatures, unique estimates for the non-growing season rate in all biomes will  
361 be important for constraining the global exudate C flux.

362 Consider the effects of global change: Global environmental change affects numerous plant and soil  
363 processes, and a number of experimental measurements suggest drivers such as warming, drought, or  
364 elevated CO<sub>2</sub> will affect the root exudation rate as well (*e.g.*, Phillips et al. 2011; Xiong et al. 2020; Brunn  
365 et al. 2022). If the estimates made in this paper are applied to climate change scenarios or experiments,  
366 estimates of root exudation would scale with GPP responses to climate change (*e.g.*, increase under eCO<sub>2</sub>  
367 or decrease under drought). However, experiments suggest global change effects on exudation rates are  
368 not conserved in this manner – eCO<sub>2</sub> has been found to decrease SER on numerous occasions (Dong et al.  
369 2021), and drought to increase it (Calvo et al. 2019). We encourage scientists to continue measuring SER  
370 responses to climate change, and specifically to do so *in situ* in large-scale global change experiments  
371 with multiple drivers of change to help constrain these estimates.

372 Consider exudation in the context of root traits: Plants exhibit a suite of root traits, many related to  
373 nutrient or water acquisition, that can vary based on their individual physiology or environment. Most  
374 measured root traits are morphological (*e.g.*, specific root length, root tissue density, root diameter) or  
375 related to growth (*e.g.*, fine root biomass, production, turnover) (*e.g.*, Kong et al. 2019; Chen et al. 2021).  
376 Because exudation can be a plant strategy for acquiring both inorganic and organic soil nutrients (*e.g.*,  
377 Jones and Darrah 1994; Meier et al. 2017), we suggest researchers measuring root exudation incorporate

378 it as a root trait in analyses of the root economic spectrum. Plants may trade off belowground C  
379 investment to exudation as opposed to structural C investment in root system expansion depending on  
380 their environment. Establishing relationships between exudation and other root traits may improve our  
381 ability to predict exudation rates and fluxes.

382

383 *Conclusion.* This study represents the first effort to estimate the root exudate C flux at the biome and  
384 global scales. Our results suggest that root exudation is a considerable C flux into soils (roughly 10.4% of  
385 global GPP), that grasslands represent a relatively high exudate C flux due to their high fine root biomass,  
386 and that root exudation rates do not vary strongly across latitude or global gradients of temperature,  
387 precipitation, or soil heterotrophic respiration. We found some evidence that mycorrhizal associations  
388 impact root-specific exudation rates but note that studies where arbuscular and ectomycorrhizal plants co-  
389 occur showed no differences in exudation rates. Importantly, our analyses also indicate that measurements  
390 of this flux are data poor outside of temperate forests. Thus, we call for more measurements of root  
391 exudation in grasslands, tropical rainforests, and agroecosystems. Given the magnitude of the exudate C  
392 flux that our analysis suggests, we call for its continued and increasingly detailed incorporation into  
393 ecosystem C budgets and process based models.

394

#### 395 **References.**

396 Abramoff R, Xu X, Hartman M, et al (2018) The Millennial model: in search of measurable pools and  
397 transformations for modeling soil carbon in the new century. *Biogeochemistry* 137:51–71.  
398 <https://doi.org/10.1007/s10533-017-0409-7>

399 Almagro M, López J, Boix-Fayos C, et al (2010) Belowground carbon allocation patterns in a dry  
400 Mediterranean ecosystem: A comparison of two models. *Soil Biology and Biochemistry*  
401 42:1549–1557. <https://doi.org/10.1016/j.soilbio.2010.05.031>

402 Badgley G, Anderegg LDL, Berry JA, Field CB (2019) Terrestrial gross primary production: Using NIRV  
403 to scale from site to globe. *Global Change Biology* 25:3731–3740.  
404 <https://doi.org/10.1111/gcb.14729>

405 Barber DA, Martin JK (1976) The release of organic substances by cereal roots into soil. *New Phytologist*  
406 76:69–80. <https://doi.org/10.1111/j.1469-8137.1976.tb01439.x>



- 407 Bolan NS, Naidu R, Mahimairaja S, Baskaran S (1994) Influence of low-molecular-weight organic acids  
408 on the solubilization of phosphates. *Biology and Fertility of Soils* 18:311–319.  
409 <https://doi.org/10.1007/BF00570634>
- 410 Brunn M, Hafner BD, Zwetsloot MJ, et al (2022) Carbon allocation to root exudates is maintained in  
411 mature temperate tree species under drought. *New Phytologist* 235:965–977.  
412 <https://doi.org/10.1111/nph.18157>
- 413 Brzostek ER, Fisher JB, Phillips RP (2014) Modeling the carbon cost of plant nitrogen acquisition:  
414 Mycorrhizal trade-offs and multipath resistance uptake improve predictions of retranslocation.  
415 *Journal of Geophysical Research: Biogeosciences* 119:1684–1697.  
416 <https://doi.org/10.1002/2014JG002660>
- 417 Calvo OC, Franzaring J, Schmid I, Fangmeier A (2019) Root exudation of carbohydrates and cations  
418 from barley in response to drought and elevated CO<sub>2</sub>. *Plant and Soil* 438:127–142.  
419 <https://doi.org/10.1007/s11104-019-03998-y>
- 420 Carol Adair E, Reich PB, Hobbie SE, Knops JMH (2009) Interactive Effects of Time, CO<sub>2</sub>, N, and  
421 Diversity on Total Belowground Carbon Allocation and Ecosystem Carbon Storage in a  
422 Grassland Community. *Ecosystems* 12:1037–1052. <https://doi.org/10.1007/s10021-009-9278-9>
- 423 Chari NR, Taylor BN (2022) Soil organic matter formation and loss are mediated by root exudates in a  
424 temperate forest. *Nature Geoscience*. <https://doi.org/10.1038/s41561-022-01079-x>
- 425 Chen W, Wu Y, Fritschi FB, Juenger TE (2021) The genetic basis of the root economics spectrum in a  
426 perennial grass. *Proceedings of the National Academy of Sciences* 118:e2107541118.  
427 <https://doi.org/10.1073/pnas.2107541118>
- 428 Churkina G, Schimel D, Braswell BH, Xiao X (2005) Spatial analysis of growing season length control  
429 over net ecosystem exchange. *Global Change Biology* 11:1777–1787.  
430 <https://doi.org/10.1111/j.1365-2486.2005.001012.x>
- 431 Collalti A, Prentice IC (2019) Is NPP proportional to GPP? Waring’s hypothesis 20 years on. *Tree*  
432 *Physiology* 39:1473–1483. <https://doi.org/10.1093/treephys/tpz034>
- 433 Dong J, Hunt J, Delhaize E, et al (2021) Impacts of elevated CO<sub>2</sub> on plant resistance to nutrient  
434 deficiency and toxic ions via root exudates: A review. *Science of The Total Environment*  
435 754:142434. <https://doi.org/10.1016/j.scitotenv.2020.142434>
- 436 Drake JE, Gallet-Budynek A, Hofmockel KS, et al (2011) Increases in the flux of carbon belowground  
437 stimulate nitrogen uptake and sustain the long-term enhancement of forest productivity under  
438 elevated CO<sub>2</sub>. *Ecology Letters* 14:349–357. <https://doi.org/10.1111/j.1461-0248.2011.01593.x>
- 439 Dror D, Klein T (2022) The effect of elevated CO<sub>2</sub> on aboveground and belowground carbon allocation  
440 and eco-physiology of four species of angiosperm and gymnosperm forest trees. *Tree Physiology*  
441 42:831–847. <https://doi.org/10.1093/treephys/tpab136>
- 442 Fossum C, Estera-Molina KY, Yuan M, et al (2022) Belowground allocation and dynamics of recently  
443 fixed plant carbon in a California annual grassland. *Soil Biology and Biochemistry* 165:108519.  
444 <https://doi.org/10.1016/j.soilbio.2021.108519>

- 445 Gillespie AR, Pope PE (1991) Consequences of rhizosphere acidification on delivery and uptake kinetics  
446 of soil phosphorus. *Tree Physiology* 8:195–204. <https://doi.org/10.1093/treephys/8.2.195>
- 447 Hawkins H-J, Cargill RIM, Van Nuland ME, et al (2023) Mycorrhizal mycelium as a global carbon pool.  
448 *Current Biology* 33:R560–R573. <https://doi.org/10.1016/j.cub.2023.02.027>
- 449 Hoffland E (1992) Quantitative evaluation of the role of organic acid exudation in the mobilization of  
450 rock phosphate by rape. *Plant and Soil* 140:279–289. <https://doi.org/10.1007/BF00010605>
- 451 Jackson RB, Mooney HA, Schulze E-D (1997) A global budget for fine root biomass, surface area, and  
452 nutrient contents. *Proceedings of the National Academy of Sciences* 94:7362–7366.  
453 <https://doi.org/10.1073/pnas.94.14.7362>
- 454 Jones DL, Darrah PR (1994) Role of root derived organic acids in the mobilization of nutrients from the  
455 rhizosphere. *Plant and Soil* 166:247–257. <https://doi.org/10.1007/BF00008338>
- 456 Jones DL, Dennis PG, Owen AG, van Hees PAW (2003) Organic acid behavior in soils – misconceptions  
457 and knowledge gaps. *Plant and Soil* 248:31–41. <https://doi.org/10.1023/A:1022304332313>
- 458 Kaiser C, Kilburn MR, Clode PL, et al (2015) Exploring the transfer of recent plant photosynthates to soil  
459 microbes: mycorrhizal pathway vs direct root exudation. *New Phytologist* 205:1537–1551.  
460 <https://doi.org/10.1111/nph.13138>
- 461 Kicklighter DW, Bondeau A, Schloss AL, et al (1999) Comparing global models of terrestrial net primary  
462 productivity (NPP): global pattern and differentiation by major biomes. *Global Change Biology*  
463 5:16–24. <https://doi.org/10.1046/j.1365-2486.1999.00003.x>
- 464 Kong D, Wang J, Wu H, et al (2019) Nonlinearity of root trait relationships and the root economics  
465 spectrum. *Nature Communications* 10:2203. <https://doi.org/10.1038/s41467-019-10245-6>
- 466 Kuzyakov Y, Friedel JK, Stahr K (2000) Review of mechanisms and quantification of priming effects.  
467 *Soil Biology and Biochemistry* 32:1485–1498. [https://doi.org/10.1016/S0038-0717\(00\)00084-5](https://doi.org/10.1016/S0038-0717(00)00084-5)
- 468 Litton CM, Sandquist DR, Cordell S (2008) A non-native invasive grass increases soil carbon flux in a  
469 Hawaiian tropical dry forest. *Global Change Biology* 14:726–739. <https://doi.org/10.1111/j.1365-2486.2008.01546.x>
- 471 Markus Z, Rauthe-Schöch A, Hänsel S, et al (2022) GPCP Full Data Daily Version 2022 at 1.0°: Daily  
472 Land-Surface Precipitation from Rain-Gauges built on GTS-based and Historic Data: Globally  
473 Gridded Daily Totals. approx. 25 MB per gzip file
- 474 McCormack ML, Dickie IA, Eissenstat DM, et al (2015) Redefining fine roots improves understanding of  
475 below-ground contributions to terrestrial biosphere processes. *New Phytologist* 207:505–518.  
476 <https://doi.org/10.1111/nph.13363>
- 477 Meier IC, Finzi AC, Phillips RP (2017) Root exudates increase N availability by stimulating microbial  
478 turnover of fast-cycling N pools. *Soil Biology and Biochemistry* 106:119–128.  
479 <https://doi.org/10.1016/j.soilbio.2016.12.004>

- 480 Palmroth S, Oren R, McCarthy HR, et al (2006) Aboveground sink strength in forests controls the  
481 allocation of carbon below ground and its [CO<sub>2</sub>]-induced enhancement. *Proceedings of the*  
482 *National Academy of Sciences* 103:19362–19367. <https://doi.org/10.1073/pnas.0609492103>
- 483 Phillips RP, Brzostek E, Midgley MG (2013) The mycorrhizal-associated nutrient economy: a new  
484 framework for predicting carbon–nutrient couplings in temperate forests. *New Phytologist*  
485 199:41–51. <https://doi.org/10.1111/nph.12221>
- 486 Phillips RP, Ertlitz Y, Bier R, Bernhardt ES (2008) New approach for capturing soluble root exudates in  
487 forest soils. *Functional Ecology* 22:990–999. <https://doi.org/10.1111/j.1365-2435.2008.01495.x>
- 488 Phillips RP, Finzi AC, Bernhardt ES (2011) Enhanced root exudation induces microbial feedbacks to N  
489 cycling in a pine forest under long-term CO<sub>2</sub> fumigation. *Ecology Letters* 14:187–194.  
490 <https://doi.org/10.1111/j.1461-0248.2010.01570.x>
- 491 Piao S, Friedlingstein P, Ciais P, et al (2007) Growing season extension and its impact on terrestrial  
492 carbon cycle in the Northern Hemisphere over the past 2 decades. *Global Biogeochemical Cycles*  
493 21:. <https://doi.org/10.1029/2006GB002888>
- 494 Raich JW, Clark DA, Schwendenmann L, Wood TE (2014) Aboveground Tree Growth Varies with  
495 Belowground Carbon Allocation in a Tropical Rainforest Environment. *PLOS ONE* 9:e100275.  
496 <https://doi.org/10.1371/journal.pone.0100275>
- 497 Read DJ (1991) Mycorrhizas in ecosystems. *Experientia* 47:376–391.  
498 <https://doi.org/10.1007/BF01972080>
- 499 Rohde RA, Hausfather Z (2020) The Berkeley Earth land/ocean temperature record. *Earth System*  
500 *Science Data* 12:3469–3479
- 501 Shi S, Richardson AE, O’Callaghan M, et al (2011) Effects of selected root exudate components on soil  
502 bacterial communities. *FEMS Microbiology Ecology* 77:600–610. <https://doi.org/10.1111/j.1574-6941.2011.01150.x>  
503
- 504 Sokol NW, Kuebbing SaraE, Karlsen-Ayala E, Bradford MA (2019a) Evidence for the primacy of living  
505 root inputs, not root or shoot litter, in forming soil organic carbon. *New Phytologist* 221:233–246.  
506 <https://doi.org/10.1111/nph.15361>
- 507 Sokol NW, Sanderman J, Bradford MA (2019b) Pathways of mineral-associated soil organic matter  
508 formation: Integrating the role of plant carbon source, chemistry, and point of entry. *Global*  
509 *Change Biology* 25:12–24. <https://doi.org/10.1111/gcb.14482>
- 510 Spohn M, Ermak A, Kuzyakov Y (2013) Microbial gross organic phosphorus mineralization can be  
511 stimulated by root exudates – A <sup>33</sup>P isotopic dilution study. *Soil Biology and Biochemistry*  
512 65:254–263. <https://doi.org/10.1016/j.soilbio.2013.05.028>
- 513 Stell E, Warner DL, Jian J, et al (2021) Carbon Monitoring System (CMS)Global Gridded 1-km Soil and  
514 Soil Heterotrophic Respiration Derived from SRDB v5. 0 MB.  
515 <https://doi.org/10.3334/ORNLDAAAC/1928>

- 516 Sulman BN, Brzostek ER, Medici C, et al (2017) Feedbacks between plant N demand and rhizosphere  
517 priming depend on type of mycorrhizal association. *Ecology Letters* 20:1043–1053.  
518 <https://doi.org/10.1111/ele.12802>
- 519 Sulman BN, Phillips RP, Oishi AC, et al (2014) Microbe-driven turnover offsets mineral-mediated  
520 storage of soil carbon under elevated CO<sub>2</sub>. *Nature Climate Change* 4:1099–1102.  
521 <https://doi.org/10.1038/nclimate2436>
- 522 Sun Y, Feng Y, Wang Y, et al (2021) Field-Based Estimation of Net Primary Productivity and Its Above-  
523 and Belowground Partitioning in Global Grasslands. *Journal of Geophysical Research:*  
524 *Biogeosciences* 126:e2021JG006472. <https://doi.org/10.1029/2021JG006472>
- 525 Tao F, Huang Y, Hungate BA, et al (2023) Microbial carbon use efficiency promotes global soil carbon  
526 storage. *Nature* 618:981–985. <https://doi.org/10.1038/s41586-023-06042-3>
- 527 Wieder WR, Hartman MD, Sulman BN, et al (2018) Carbon cycle confidence and uncertainty: Exploring  
528 variation among soil biogeochemical models. *Global Change Biology* 24:1563–1579.  
529 <https://doi.org/10.1111/gcb.13979>
- 530 Xiong D, Huang J, Yang Z, et al (2020) The effects of warming and nitrogen addition on fine root  
531 exudation rates in a young Chinese-fir stand. *Forest Ecology and Management* 458:117793.  
532 <https://doi.org/10.1016/j.foreco.2019.117793>
- 533 Yin H, Wheeler E, Phillips RP (2014) Root-induced changes in nutrient cycling in forests depend on  
534 exudation rates. *Soil Biology and Biochemistry* 78:213–221.  
535 <https://doi.org/10.1016/j.soilbio.2014.07.022>
- 536
- 537 **Funding.** The authors declare that no funds, grants, or other support were received for the preparation of  
538 this manuscript.
- 539
- 540 **Competing interests.** The authors declare no conflicts of interest.
- 541
- 542 **Author contributions.** NRC and BNT devised the study, with input from SJT and RPP. NRC and BNT  
543 synthesized the literature data, and NRC, TLB, BDH, SO, TK, MKR, and SU collected original  
544 measurements. NRC analyzed the data with input and advice from BNT, SJT, and RPP. NRC wrote the  
545 first draft of the manuscript and all authors made editorial contributions to the manuscript.
- 546
- 547 **Data availability.** The data analyzed in this study is publicly available at the following web address:  
548 [public web address to be supplied following acceptance of manuscript]  
549

550 **Tables & Figures**

551

| <b>Biome</b>                                    | <b>Median<br/>SER (ug C<br/>g<sup>-1</sup> h<sup>-1</sup>)</b> | <b>FRB<br/>(kg m<sup>-2</sup>)</b> | <b><math>P_{AFRB}</math></b> | <b>GS<br/>(d)</b> | <b>Land<br/>surface<br/>area<br/>(10<sup>6</sup> km<sup>2</sup>)</b> | <b>Total flux<br/>(PgC y<sup>-1</sup>)</b> |
|-------------------------------------------------|----------------------------------------------------------------|------------------------------------|------------------------------|-------------------|----------------------------------------------------------------------|--------------------------------------------|
| Mediterranean                                   | 119.2                                                          | 0.28                               | 0.33                         | 365               | NA <sup>1</sup>                                                      | NA <sup>1</sup>                            |
| Temperate<br>coniferous forest                  | 12.5                                                           | 0.50                               | 0.33                         | 150               | 5.0                                                                  | 0.1                                        |
| Temperate<br>deciduous forest                   | 47.4                                                           | 0.44                               | 0.33                         | 125               | 7.0                                                                  | 0.4                                        |
| Boreal forest                                   | 67.4*                                                          | 0.23                               | 0.33                         | 130               | 12.0                                                                 | 0.5                                        |
| Temperate grassland                             | 69.9                                                           | 0.95                               | 0.81                         | 100               | 9.0                                                                  | 3.5                                        |
| Savanna                                         | 67.4*                                                          | 0.51                               | 0.81                         | 210               | 15.0                                                                 | 3.3                                        |
| Tropical deciduous<br>forest/seasonal<br>forest | 134.8                                                          | 0.28                               | 0.33                         | 365               | 7.5                                                                  | 0.8                                        |
| Tropical evergreen<br>forest/rainforest         | 180.5                                                          | 0.33                               | 0.33                         | 365               | 17.0                                                                 | 2.9                                        |
| Woodland/shrubland                              | NA <sup>+</sup>                                                | NA <sup>+</sup>                    | NA <sup>+</sup>              | NA <sup>+</sup>   | 8.5                                                                  | 0.7                                        |
| Desert                                          | 67.4*                                                          | 0.13                               | 0.81                         | 200               | 18.0                                                                 | 1.0                                        |
| Tundra                                          | 67.4*                                                          | 0.34                               | 0.81                         | 55                | 8.0                                                                  | 1.0                                        |
| Cultivated                                      | NA <sup>+</sup>                                                | NA <sup>+</sup>                    | NA <sup>+</sup>              | NA <sup>+</sup>   | 14.0                                                                 | 1.1                                        |
| <b>Total (<math>G_{ex}</math>)</b>              |                                                                |                                    |                              |                   |                                                                      | <b>15.2</b>                                |

552 Table 1. Parameters used in determining the global root exudate carbon flux. \*scaled using cross-biome  
553 median SER, <sup>+</sup>scaled using cross-biome median  $F_{ex}$ , <sup>1</sup>land surface area is included in woodland/shrubland.  
554 SER = specific exudation rate; FRB = fine root biomass;  $P_{AFRB}$  = proportion absorptive fine root biomass;  
555 GS = growing season.

556

557

| Site                                                | Biome                       | TBCA (se)     | $F_{ex}$ of biome (se) | Projected proportion of TBCA (se) |
|-----------------------------------------------------|-----------------------------|---------------|------------------------|-----------------------------------|
| Cehegín, Spain <sup>a</sup>                         | Mediterranean               | 0.774 (0.035) | 0.096 (0.013)          | 0.12 (0.02)                       |
| Duke FACE, NC, USA <sup>b</sup>                     | Temperate coniferous forest | 1.191 (0.083) | 0.073 (0.033)          | 0.06 (0.03)                       |
| ORNL FACE, TN, USA <sup>b</sup>                     | Temperate deciduous forest  | 0.782 (0.044) | 0.086 (0.023)          | 0.11 (0.03)                       |
| BioCON, MN, USA <sup>c</sup>                        | Temperate grassland         | 0.682 (0.019) | 0.385 (0.078)          | 0.6 (0.1)                         |
| Kaupulehu dry forest preserve, HI, USA <sup>d</sup> | Tropical deciduous forest   | 0.97          | 0.109 (0.095)          | 0.11 (0.10)                       |
| La Selva, CR <sup>e</sup>                           | Tropical evergreen forest   | 1.03 (0.20)   | 0.169 (0.029)          | 0.16 (0.04)                       |

558 Table 2. Comparison between mass-balance TBCA (total belowground carbon allocation) and root  
559 exudate C flux ( $F_{ex}$ ) (both in  $\text{kg C m}^{-2} \text{y}^{-1}$ ) in six field sites from biomes represented in this meta-analysis.  
560 Sources for TBCA are a) Almagro et al. (2010), b) Palmroth et al. (2006), c) Carol Adair et al. (2009), d)  
561 Litton et al. (2008), e) Raich et al. (2014). TBCA = total belowground carbon allocation;  $F_{ex}$  = root  
562 exudate C flux per soil area.

563

a

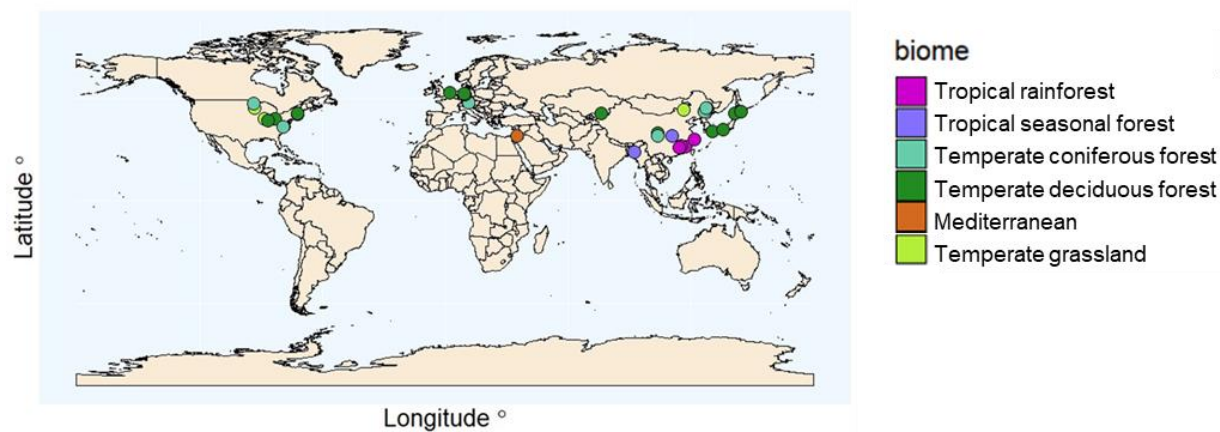

b

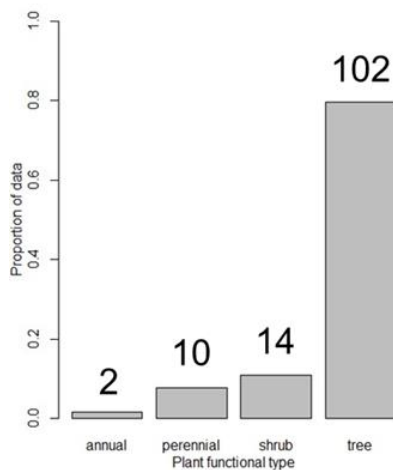

c

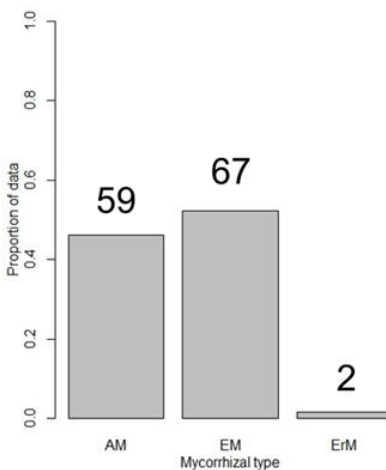

564

565 Fig. 1. a) distribution of sites in the dataset on the globe colored by biome, b) proportional distribution of

566 plant functional types in the dataset, c) proportional distribution of mycorrhizal types in the dataset. The

567 numbers in b) and c) are the number of observations of each type.

568



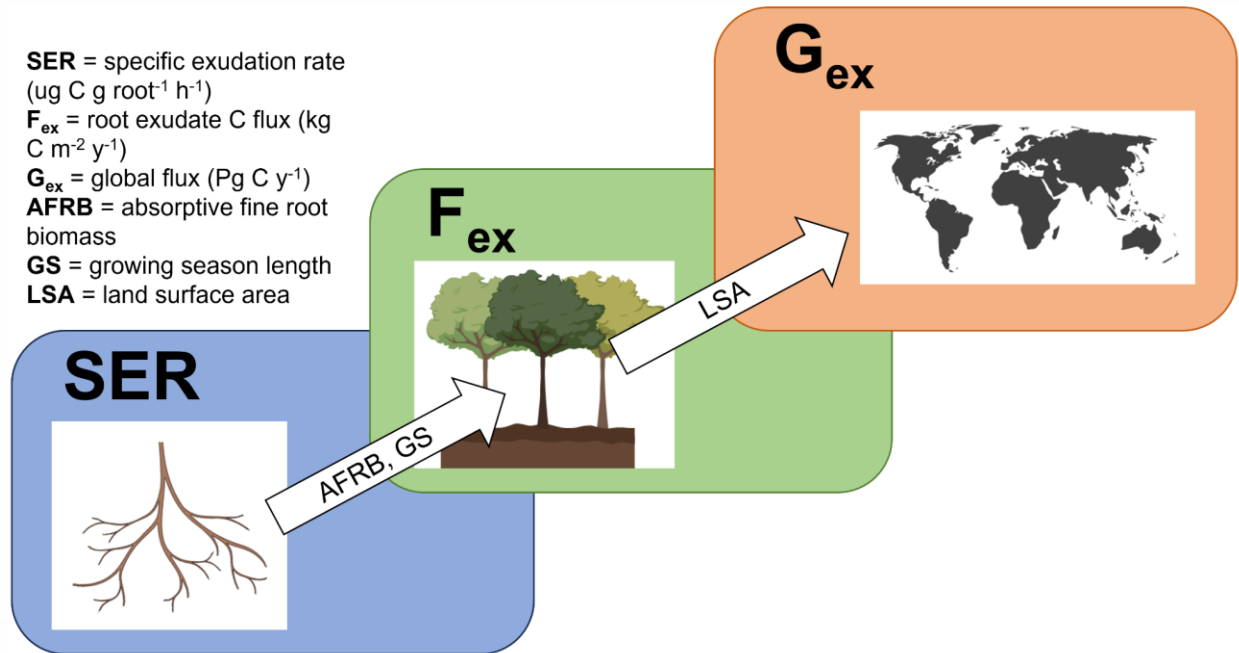

569  
570 Fig. 2. Conceptual figure illustrating the scaling process described in Methods. Specific root exudation  
571 rates (expressed on a per root mass basis) were scaled spatially using estimates of absorptive fine root  
572 biomass and temporally using estimates of growing season length to get exudate C flux estimates on a  
573 per-meter ground area basis ( $F_{\text{ex}}$ ). These estimates were then scaled to the entire biome using estimates of  
574 land surface area for each biome and all biomes were summed to get a global root exudate C flux estimate  
575 ( $G_{\text{ex}}$ ).  
576

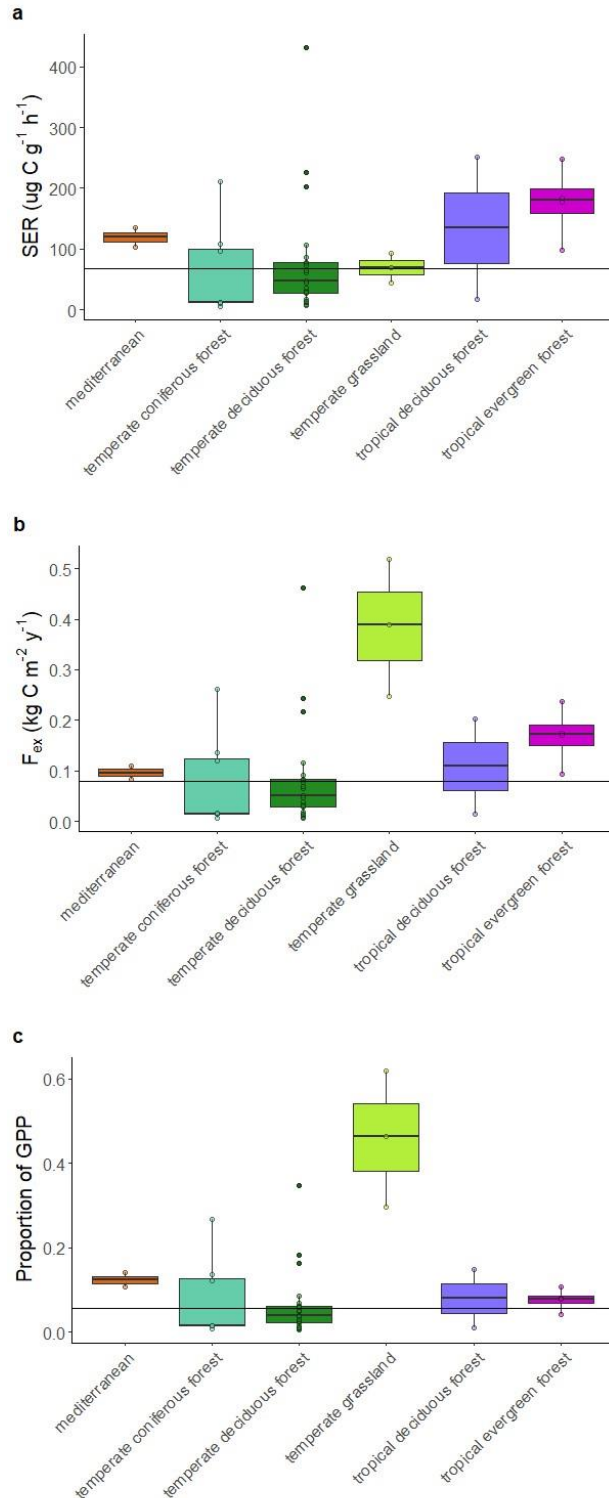

577  
578 Fig. 3. Exudation rates by biome. a) mass-specific exudation rate, b) soil area specific exudate C flux, c)  
579 proportion of GPP released as root exudates. For each biome, horizontal lines represent the median and  
580 boxes represent the inter-quartile range and whiskers represent 1.5 times the interquartile range. Colored  
581 dots represent individual data points (studies) used in our analyses and corresponding black dots represent  
582 outliers. Panel-wide black horizontal lines are cross-biome medians.

583

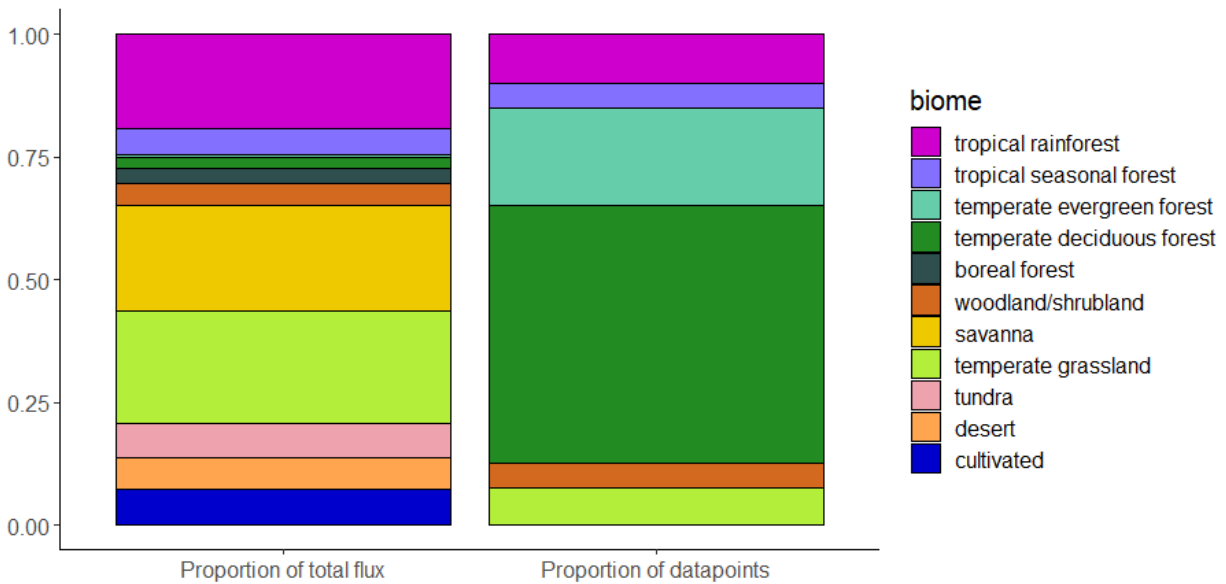

584

585 Fig. 4. The proportion of the global root exudate flux from each biome (left) and the proportion of studies  
586 represented in our dataset from each biome (right). The left bar shows the proportional contribution of  
587 each biome to the global root exudate flux (Table 1). The right bar shows the proportion of studies in our  
588 dataset from each biome. The total number of data points for the right bar is 40.
